# Supplementary material for: Discovery of Pre-Treatment FDG PET/CT-Derived Radiomics-Based Models for Predicting Outcome in Diffuse Large B-Cell Lymphoma
Source: Cancers (Basel). 2022 Mar 28;14(7):1711. doi: 10.3390/cancers14071711 (PMC8997127; doi:10.3390/cancers14071711)
Supplement: Supplementary file 1 [file cancers-14-01711-s001.zip › cancers-1649080-supplementary.pdf]

## Supplemental Material

### TRIPOD Checklist: Prediction Model Development

| Section/Topic                | Item | Checklist Item                                                                                                                                                                                   | Page |
|------------------------------|------|--------------------------------------------------------------------------------------------------------------------------------------------------------------------------------------------------|------|
| <b>Title and abstract</b>    |      |                                                                                                                                                                                                  |      |
| Title                        | 1    | Identify the study as developing and/or validating a multivariable prediction model, the target population, and the outcome to be predicted.                                                     | *    |
| Abstract                     | 2    | Provide a summary of objectives, study design, setting, participants, sample size, predictors, outcome, statistical analysis, results, and conclusions.                                          | *    |
| <b>Introduction</b>          |      |                                                                                                                                                                                                  |      |
| Background and objectives    | 3a   | Explain the medical context (including whether diagnostic or prognostic) and rationale for developing or validating the multivariable prediction model, including references to existing models. | *    |
|                              | 3b   | Specify the objectives, including whether the study describes the development or validation of the model or both.                                                                                | *    |
| <b>Methods</b>               |      |                                                                                                                                                                                                  |      |
| Source of data               | 4a   | Describe the study design or source of data (e.g., randomized trial, cohort, or registry data), separately for the development and validation data sets, if applicable.                          | *    |
|                              | 4b   | Specify the key study dates, including start of accrual; end of accrual; and, if applicable, end of follow-up.                                                                                   | *    |
| Participants                 | 5a   | Specify key elements of the study setting (e.g., primary care, secondary care, general population) including number and location of centres.                                                     | *    |
|                              | 5b   | Describe eligibility criteria for participants.                                                                                                                                                  | *    |
|                              | 5c   | Give details of treatments received, if relevant.                                                                                                                                                | *    |
| Outcome                      | 6a   | Clearly define the outcome that is predicted by the prediction model, including how and when assessed.                                                                                           | *    |
|                              | 6b   | Report any actions to blind assessment of the outcome to be predicted.                                                                                                                           | *    |
| Predictors                   | 7a   | Clearly define all predictors used in developing or validating the multivariable prediction model, including how and when they were measured.                                                    | *    |
|                              | 7b   | Report any actions to blind assessment of predictors for the outcome and other predictors.                                                                                                       | *    |
| Sample size                  | 8    | Explain how the study size was arrived at.                                                                                                                                                       | *    |
| Missing data                 | 9    | Describe how missing data were handled (e.g., complete-case analysis, single imputation, multiple imputation) with details of any imputation method.                                             | *    |
| Statistical analysis methods | 10a  | Describe how predictors were handled in the analyses.                                                                                                                                            | *    |
|                              | 10b  | Specify type of model, all model-building procedures (including any predictor selection), and method for internal validation.                                                                    | *    |
|                              | 10d  | Specify all measures used to assess model performance and, if relevant, to compare multiple models.                                                                                              | *    |
| Risk groups                  | 11   | Provide details on how risk groups were created, if done.                                                                                                                                        | *    |
| <b>Results</b>               |      |                                                                                                                                                                                                  |      |

|                           |     |                                                                                                                                                                                                       |   |
|---------------------------|-----|-------------------------------------------------------------------------------------------------------------------------------------------------------------------------------------------------------|---|
| Participants              | 13a | Describe the flow of participants through the study, including the number of participants with and without the outcome and, if applicable, a summary of the follow-up time. A diagram may be helpful. | * |
|                           | 13b | Describe the characteristics of the participants (basic demographics, clinical features, available predictors), including the number of participants with missing data for predictors and outcome.    | * |
| Model development         | 14a | Specify the number of participants and outcome events in each analysis.                                                                                                                               | * |
|                           | 14b | If done, report the unadjusted association between each candidate predictor and outcome.                                                                                                              | * |
| Model specification       | 15a | Present the full prediction model to allow predictions for individuals (i.e., all regression coefficients, and model intercept or base-line survival at a given time point).                          | * |
|                           | 15b | Explain how to use the prediction model.                                                                                                                                                              | * |
| Model performance         | 16  | Report performance measures (with CIs) for the prediction model.                                                                                                                                      | * |
| <b>Discussion</b>         |     |                                                                                                                                                                                                       |   |
| Limitations               | 18  | Discuss any limitations of the study (such as nonrepresentative sample, few events per predictor, missing data).                                                                                      | * |
| Interpretation            | 19b | Give an overall interpretation of the results, considering objectives, limitations, and results from similar studies, and other relevant evidence.                                                    | * |
| Implications              | 20  | Discuss the potential clinical use of the model and implications for future research.                                                                                                                 | * |
| <b>Other information</b>  |     |                                                                                                                                                                                                       |   |
| Supplementary information | 21  | Provide information about the availability of supplementary resources, such as study protocol, Web calculator, and data sets.                                                                         | * |
| Funding                   | 22  | Give the source of funding and the role of the funders for the present study.                                                                                                                         | * |

\*See section in comments.

We recommend using the TRIPOD Checklist in conjunction with the TRIPOD Explanation and Elaboration document.

- 1 This study looks at the utility of pre-treatment FDG PET/CT derived machine learning models for outcome prediction in diffuse large B-cell lymphoma (DLBCL). (**Title**)
- 2 A summary of all the requested information is presented in the **Abstract**.
- 3
  - a) The introduction presents the background, aim of the model and the previous studies which have explored models containing radiomic features from the baseline PET/CT. (**Introduction**)
  - b) The aim of this study was to create a predictive model using both clinical and radiomic features derived from pre-treatment FDG PET/CT to predict 2-year EFS in DLBCL patients using a cohort from a tertiary treatment centre (**Introduction**)
- 4
  - a) Retrospective single centre cohort study. The study cohort was randomised on a ratio of 4:1 into training and testing cohorts stratified around 2-EFS, age, sex and disease stage. (**Patient selection**)

b) Consecutive patients with histologically proven DLBCL NOS who underwent baseline FDG-PET/CT at a single large tertiary referral centre between June 2008 and January 2018 were included. The follow up information recorded is set out in the patient selection section. **(Patient selection)**

5 a) This is a single tertiary centre study. **(Patient selection)**

b) Patients were excluded if they did not have DLBCL NOS, were under 16 years of age, had no measurable disease on PET/CT when using a 4.0SUV or had hepatic involvement, had a concurrent malignancy, were not treated with R-CHOP or if the images were degraded or incomplete. The follow up information recorded is set out **(Patient selection)**

c) The treatment regimen was with RCHOP for all patients. No change to departmental standard treatment was performed. **(Patient selection)**

6 a) A 2-EFS event was defined as recurrence or death from any cause within the 2-year follow up period. **(Patient selection)**

b) As this was a retrospective study the primary outcomes were defined from clinical records. The investigator reviewing the records was blinded to the imaging parameters.

7 a) The description of the contouring method, resampling, harmonisation, radiomic feature extraction, feature selection and model training and testing is documented within the materials and methods section. The features selected as part of the chosen model are described the results section. **(Materials and methods, Results)**

b) The images were contoured blinded to the outcome data.

8 All patients which met the inclusion criteria were included. The cut-off of January 2018 was chosen to allow for 2 years follow up whilst minimising confounding factors introduced by the Covid-19 pandemic. For feature selection 5 features were chosen as the maximum number of features to be include in each model. This was derived from 10 events per parameter, with 50 events within the training cohort. This was not the case for the lasso and elastinet models whose feature selection was derived by the penalty applied to the models **(Materials and methods, Results)**

9 Only complete data sets were used in the analysis. **(Results)**

10 a) Clinical factors were included in the variable selection process alongside radiomic features. The categorical data was dummy encoded and the continuous features were normalised using a standard scaler. **(Machine learning analysis)**

b) Random forest, support vector machine, ridge regression, lasso regression, elasticnet regression and k-nearest neighbour models were trained and tuned on the training cohort using four fold cross validation with 25 repeats. The models were created using different feature selection methods, using two different segmentation techniques and two different PET bin widths. The model with the highest mean receiver operating characteristic (ROC) area under the curve (AUC) was tested once on the unseen test cohort. **(Machine learning analysis)**

d) When comparing models, the mean validation AUC was used to determine the best performing model, the model with the highest being tested on the unseen test set **(Machine learning analysis)**

11 Risk groups were not created within the model.

13 a) 229 patients were included, with demographics detailed in **Table 2. (Results)**

- b) The characteristics of the participants are presented in **Table 2**.
- 14 a) The number of events per cohort are presented in **Table 2**.  
b) This has not been performed. The training and testing cohorts were stratified around key clinical features but the results are not adjusted for these.
- 15 a/b) The features and hyperparameters used to create the model are presented in the results section.
- 16 The mean validation and test ROC curves are presented, standard deviations are presented for the mean training and mean validation scores. The confusion matrix with the accuracy, sensitivity, specificity, negative predictive value and negative predictive value for the best performing model with the a threshold derived using the Youden index from the ROC curve (**Results**)
- 18 The limitations of the study are presented in the discussion. These include the retrospective nature of the study, the relative low number of events, reliance on clinical records, the exclusion of patients with hepatic disease or not having measurable disease above 4.0 SUV, and that there was no external validation. (**Discussion**)
- 19 b)/20. The discussion section gives an overall interpretation of the results, it highlights the potential use of a pre-treatment model, but discusses the next steps needed to make this clinically viable (**Discussion**)
- 21 The python libraries used are references within the text and the radiomic features extracted using PyRadiomics are detailed in **Supplementary Material Table 1**.
- 22 Individual author's funding is declared within the **Declaration**. The study was not externally funded.

**Table S1.** Radiomic features extracted for both the PET and CT components.

| First Order     | Shape             | GLCM               | GLRLM                                | GLDM                                 | GLSZM                                | NGTDM      |
|-----------------|-------------------|--------------------|--------------------------------------|--------------------------------------|--------------------------------------|------------|
| 10th Percentile | Elongation        | Autocorrelation    | Grey Level Non-Uniformity            | Dependence Entropy                   | Grey Level Non-Uniformity            | Busyness   |
| 90th Percentile | Flatness          | Cluster Prominence | Grey Level Non-Uniformity Normalized | Dependence Non-Uniformity            | Grey Level Non-Uniformity Normalized | Coarseness |
| Energy          | Least Axis Length | Cluster Shade      | Grey Level Variance                  | Dependence Non-Uniformity Normalized | Grey Level Variance                  | Complexity |
| Entropy         | Major Axis Length | Cluster Tendency   | High Grey Level Run Emphasis         | Dependence Variance                  | High Grey Level Zone Emphasis        | Contrast   |

|                                |                            |                     |                                    |                                           |                                     |          |
|--------------------------------|----------------------------|---------------------|------------------------------------|-------------------------------------------|-------------------------------------|----------|
| Inter quartile Range           | Maximum 2D Diameter Column | Contrast            | Long Run Emphasis                  | Grey Level Non-Uniformity                 | Large Area Emphasis                 | Strength |
| Kurtosis                       | Maximum 2D Diameter Row    | Correlation         | Long Run High Grey Level Emphasis  | Grey Level Variance                       | Large Area High Grey Level Emphasis |          |
| Maximum                        | Maximum 2D Diameter Slice  | Difference Average  | Long Run Low Grey Level Emphasis   | High Grey Level Emphasis                  | Large Area Low Grey Level Emphasis  |          |
| Mean Absolute Deviation        | Maximum 3D Diameter        | Difference Entropy  | Low Grey Level Run Emphasis        | Large Dependence Emphasis                 | Low Grey Level Zone Emphasis        |          |
| Mean                           | Mesh Volume                | Difference Variance | Run Entropy                        | Large Dependence High Grey Level Emphasis | Size Zone Non-Uniformity            |          |
| Median                         | Minor Axis Length          | Id                  | Run Length Non-Uniformity          | Large Dependence Low Grey Level Emphasis  | Size Zone Non-Uniformity Normalized |          |
| Minimum                        | Sphericity                 | Idm                 | Run Percentage                     | Low Grey Level Emphasis                   | Small Area Emphasis                 |          |
| Range                          | Surface Area               | Idmn                | Run Variance                       | Small Dependence Emphasis                 | Small Area High Grey Level Emphasis |          |
| Robust Mean Absolute Deviation | Surface Volume Ratio       | Idn                 | Short Run Emphasis                 | Small Dependence High Grey Level Emphasis | Small Area Low Grey Level Emphasis  |          |
| Root Mean Squared              | Voxel Volume               | Imc1                | Short Run High Grey Level Emphasis | Small Dependence Low Grey Level Emphasis  | Zone Entropy                        |          |
| Skewness                       |                            | Imc2                | Short Run Low Grey Level Emphasis  |                                           | Zone Percentage                     |          |
| Total Energy                   |                            | Inverse Variance    |                                    |                                           | Zone Variance                       |          |

---

Uniformity

Joint Average

Variance

Joint Energy

Joint Entropy

MCC

Maximum Probability

Sum Average

Sum Entropy

Sum Squares

---

The equations for the features can be found at <https://pyradiomics.readthedocs.io/en/latest/features.html>. GLCM = grey level co-occurrence matrix, GLDM = grey level dependence matrix, GLRLM = grey level run length matrix, GLSZM = grey level size zone matrix, NGTDM = neighbouring grey tone difference matrix, Id = inverse difference, Idn = inverse difference normalised, Imc = informational measure of correlation, Idm = inverse difference moment, Idmn = inverse difference moment normalised, MCC = maximal correlation coefficient. Each of the first and second order features were extracted from the original imaging and then from the images following filters applied. The filters used were: wavelet; log-signa; square; square root; logarithm; exponential; gradient; lbp-3D.

**Table S2.** The hyperparameters explored within the grid search and the hyperparameters kept static when training the different machine learning models.

| Model                          | List of hyperparameters explored                                                                                                                                                                                                                                                                                                                                                                    | Static hyperparameters                                                                                  |
|--------------------------------|-----------------------------------------------------------------------------------------------------------------------------------------------------------------------------------------------------------------------------------------------------------------------------------------------------------------------------------------------------------------------------------------------------|---------------------------------------------------------------------------------------------------------|
| Lasso Logistic Regression      | C = [0.0000001, 0.000001, 0.00001, 0.0001, 0.001, 0.01, 0.1, 1, 10, 100]<br>solver = ['liblinear', 'saga']                                                                                                                                                                                                                                                                                          | random_state=0<br>class_weight="balanced"<br>max_iter =10000                                            |
| Elasticnet Logistic Regression | C = [0.0000001, 0.000001, 0.00001, 0.0001, 0.001, 0.01, 0.1, 1, 10, 100]<br>l1_ratio = [0.1, 0.2, 0.3, 0.4, 0.5, 0.6, 0.7, 0.8, 0.9]                                                                                                                                                                                                                                                                | penalty = 'elasticnet'<br>solver = "saga"<br>random_state=0, class_weight="balanced"<br>max_iter =10000 |
| Ridge Logistic Regression      | C = [0.0000001, 0.000001, 0.00001, 0.0001, 0.001, 0.01, 0.1, 1, 10, 100]<br>solver = ['liblinear', 'saga', "sag", 'lbfgs', 'newton-cg']                                                                                                                                                                                                                                                             | penalty = 'l2'<br>random_state=0<br>class_weight="balanced"<br>max_iter =10000                          |
| Support Vector Machine         | C = [0.0000001, 0.000001, 0.00001, 0.0001, 0.001, 0.01, 0.1, 1, 10]<br>gamma = expon(scale=.1)<br>kernel = ['linear', 'rbf', "sigmoid", "poly"]                                                                                                                                                                                                                                                     | random_state=0<br>class_weight="balanced"<br>probability = True                                         |
| Random Forest                  | n_estimators = [int(x) for x in np.linspace(start = 10, stop = 250, num = 40)]<br>max_features = ['log2', 'sqrt']<br>max_depth = [int(x) for x in np.linspace(start = 1, stop = 10, num = 5)]<br>min_samples_split = [int(x) for x in np.linspace(start = 2, stop = 50, num = 49)]<br>min_samples_leaf = [int(x) for x in np.linspace(start = 2, stop = 50, num = 49)]<br>bootstrap = [True, False] | random_state = 0<br>class_weight = "balanced"                                                           |
| K-Nearest Neighbour            | n_neighbors = range(1, 21, 2)<br>weights = ['uniform', 'distance']<br>metric = ['euclidean', 'manhattan', 'minkowski']                                                                                                                                                                                                                                                                              |                                                                                                         |

If a hyperparameter is not documented, it was left as the default within the library.
